# Supplementary material for: Synthesis of hierarchical ferrierite using piperidine and tetramethylammonium hydroxide as cooperative structure-directing agents
Source: Royal Society of Chemistry journal article supplement (doi:10.1039/c4ra14874f), 2015-01-01
Supplement: c4ra14874f1.pdf [file c4ra14874f1.pdf]

**Synthesis of Hierarchical Ferrierite Using Piperidine and  
Tetramethylammonium Hydroxide as Cooperative Structure-Directing Agents**

Teng Xue, Huaping Liu, Yi Meng Wang\*

Shanghai Key Laboratory of Green Chemistry and Chemical Processes, Department  
of Chemistry, East China Normal University, North Zhongshan Rd. 3663, Shanghai  
200062, China; Tel: 0086-21-62232251; Fax: 0086-21-62232251; E-mail:  
ymwang@chem.ecnu.edu.cn

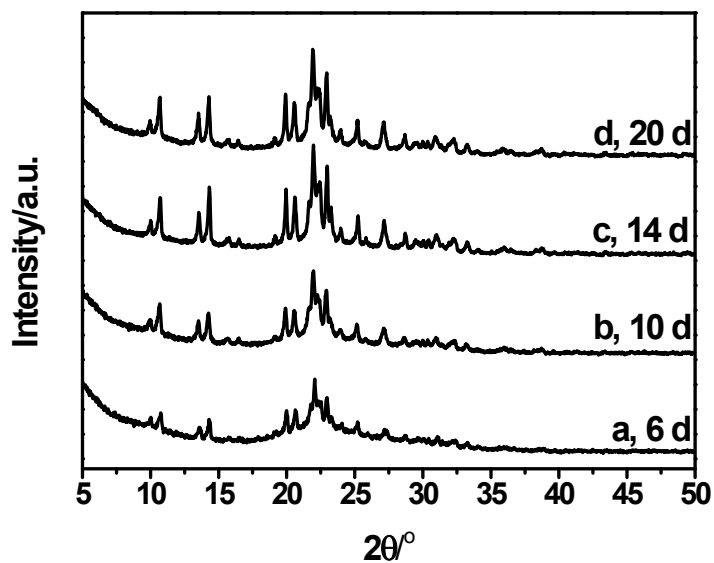

Fig. S1 XRD patterns of the obtained powders synthesized with the molar composition of  $\text{SiO}_2$ : 0.033  $\text{Al}_2\text{O}_3$ : 0.35 piperidine: 0.26 TMAOH: 0  $\text{Na}_2\text{O}$ : 10  $\text{H}_2\text{O}$  after crystallizing at 150 °C for 6 days (a), 10 days (b), 14 days (c) and 20 days (d). Boehmite (64.5% of  $\text{Al}_2\text{O}_3$ ) was used as the aluminum source.
